# Supplementary material for: Ribosomal RNA fragmentation into short RNAs (rRFs) is modulated in a sex- and population of origin-specific manner
Source: PubMed Central journal article supplement (PMC7153239; doi:10.1186/s12915-020-0763-0), 2020-04-13
Supplement: 12915_2020_763_MOESM1_ESM.pdf [file 12915_2020_763_MOESM1_ESM.pdf]

# Additional File 1: Figure S1

## S1A

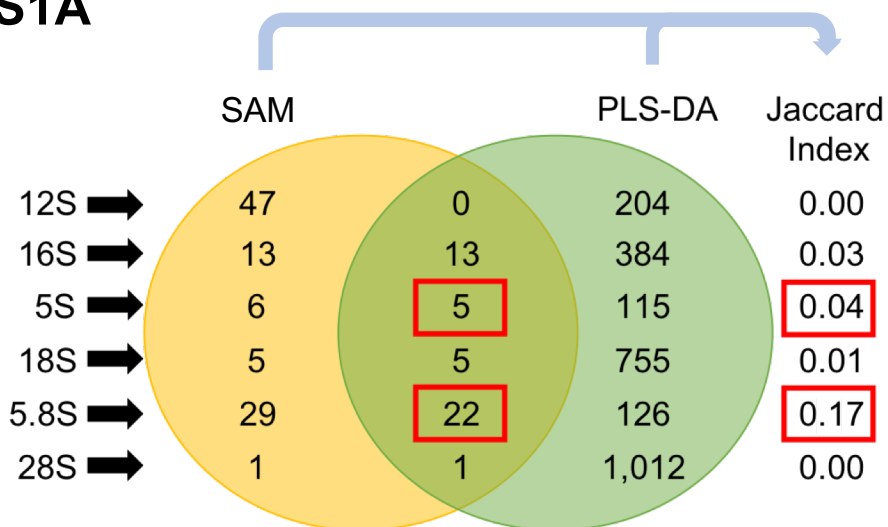

## S1B

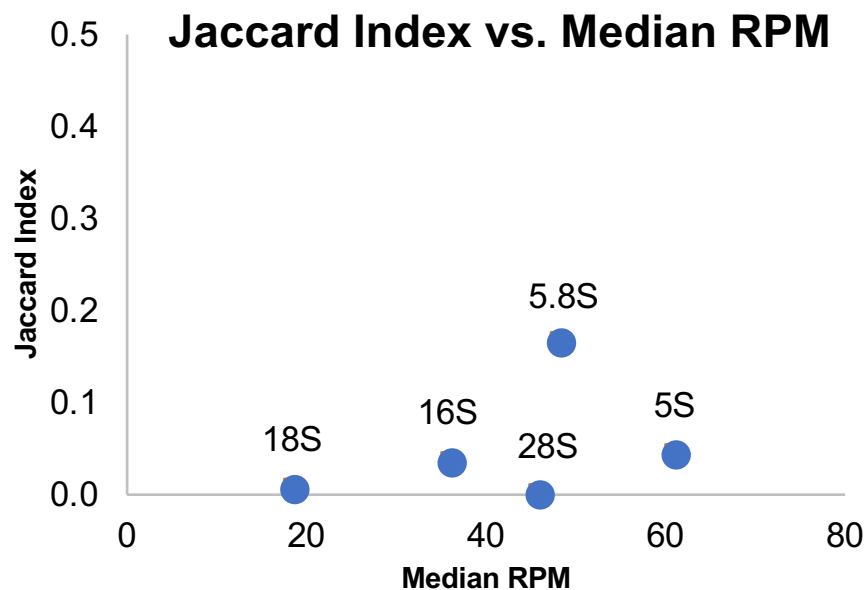

## S1C

iDAR by population and rRNA

|     |         | 12S | 16S | 5S | 18S | 5.8S | 28S |
|-----|---------|-----|-----|----|-----|------|-----|
| CEU | males   |     |     |    |     |      |     |
|     | females |     |     | 2  |     | 12   |     |
| FIN | males   |     |     |    |     |      |     |
|     | females |     | 1   | 1  | 3   |      |     |
| GBR | males   |     |     |    |     |      | 1   |
|     | females |     | 2   |    |     | 6    |     |
| TSI | males   |     | 2   |    |     |      |     |
|     | females |     |     |    |     | 4    |     |
| YRI | males   |     |     |    |     |      |     |
|     | females |     | 8   | 2  | 2   |      |     |
