# Supplementary material for: Ribosomal RNA fragmentation into short RNAs (rRFs) is modulated in a sex- and population of origin-specific manner
Source: PubMed Central journal article supplement (PMC7153239; doi:10.1186/s12915-020-0763-0), 2020-04-13

# Additional File 3: Figure S3

## S3A

434 LCL Samples  
5.8S rRF: UAAUGUGAAUUGCAGGACA

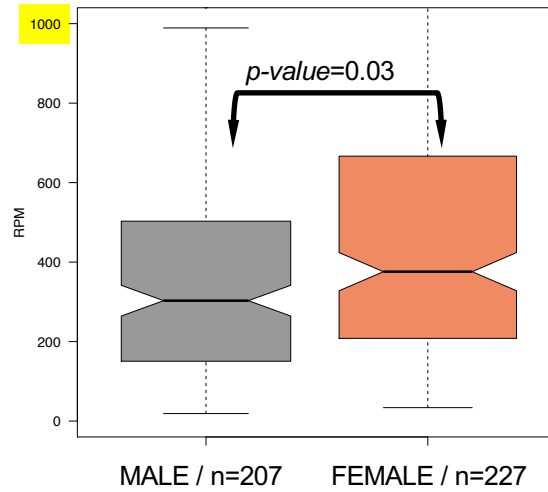

## S3B

434 LCL Samples  
5.8S rRF: UAAUGUGAAUUGCAGGACACA

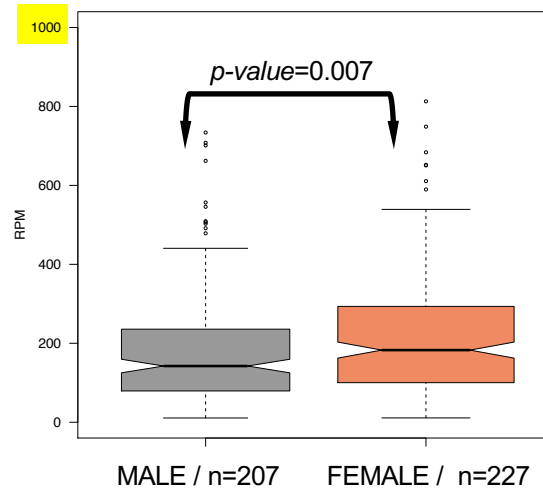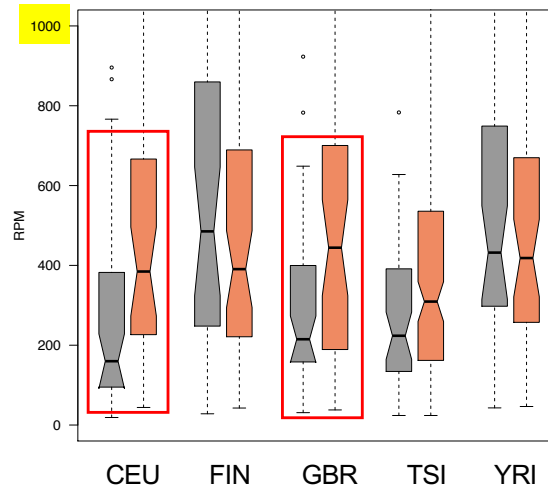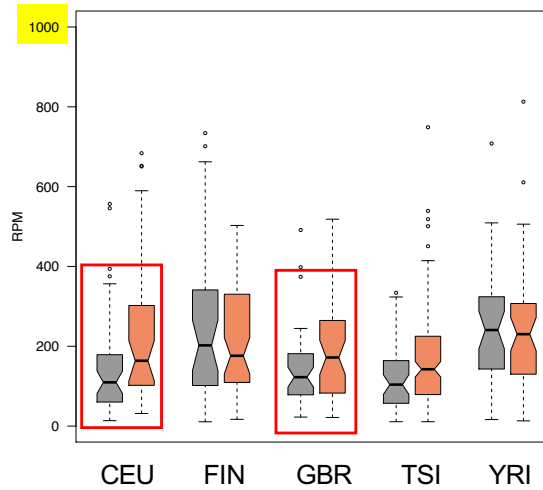

Supplement: 12915_2020_763_MOESM3_ESM.pdf [file 12915_2020_763_MOESM3_ESM.pdf]
