# Supplementary material for: Ribosomal RNA fragmentation into short RNAs (rRFs) is modulated in a sex- and population of origin-specific manner
Source: PubMed Central journal article supplement (PMC7153239; doi:10.1186/s12915-020-0763-0), 2020-04-13

# Additional File 5: Figure S4

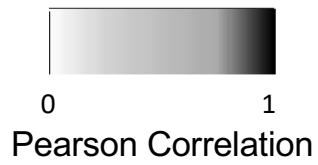

**S4A**

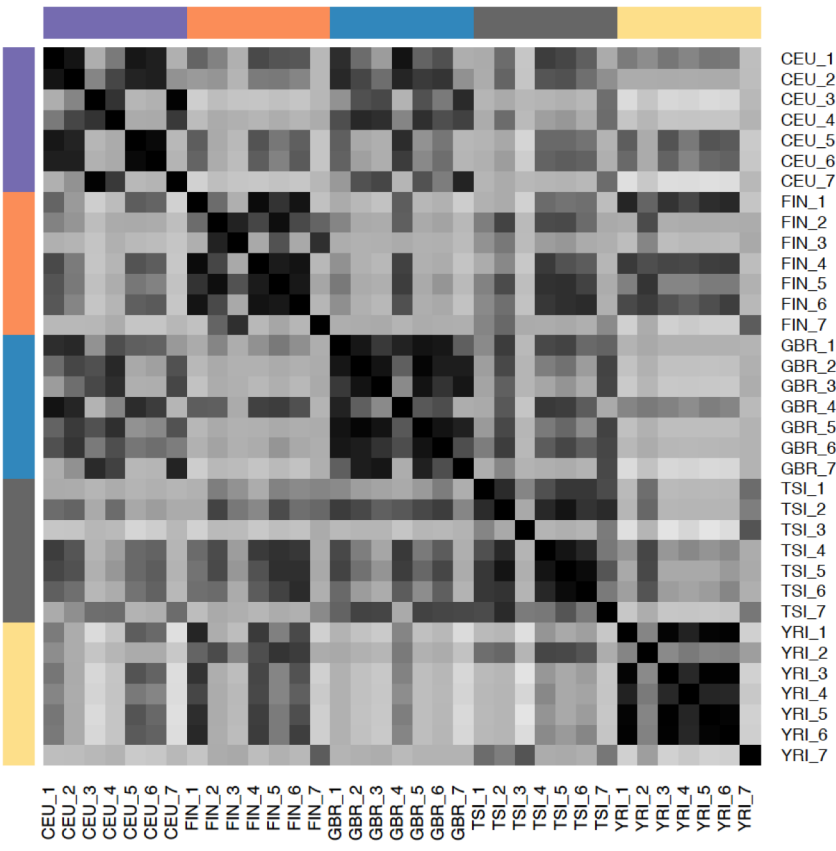

5 LCL Populations

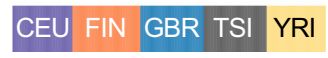

**S4B**

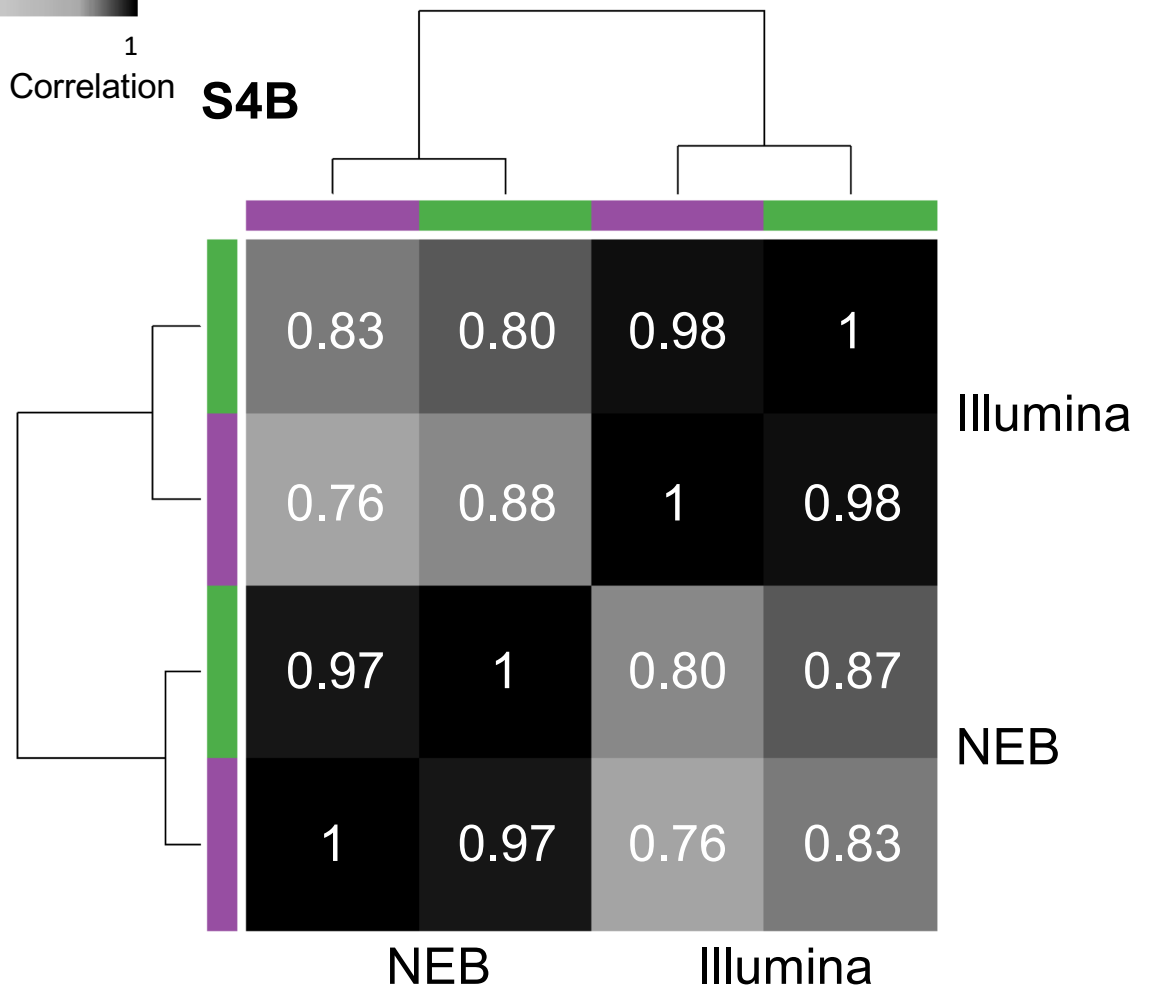

2 Corriel LCLs

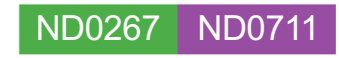

Supplement: 12915_2020_763_MOESM5_ESM.pdf [file 12915_2020_763_MOESM5_ESM.pdf]
