# Supplementary material for: Ribosomal RNA fragmentation into short RNAs (rRFs) is modulated in a sex- and population of origin-specific manner
Source: PubMed Central journal article supplement (PMC7153239; doi:10.1186/s12915-020-0763-0), 2020-04-13
Supplement: 12915_2020_763_MOESM7_ESM.pdf [file 12915_2020_763_MOESM7_ESM.pdf]

# Additional File 7: Figure S6

**S6A**

5.8S 24-mer rRF

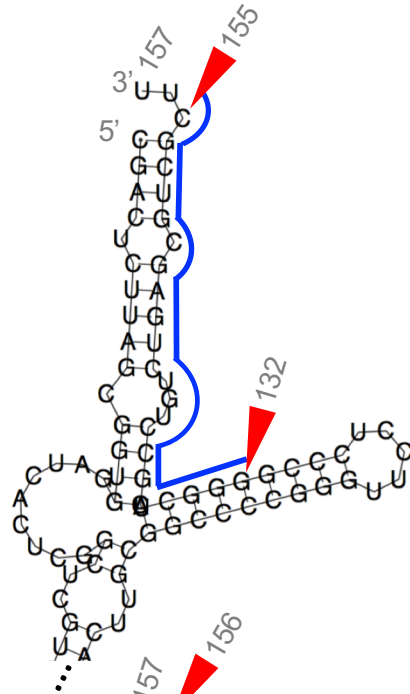

5.8S 21-mer rRF

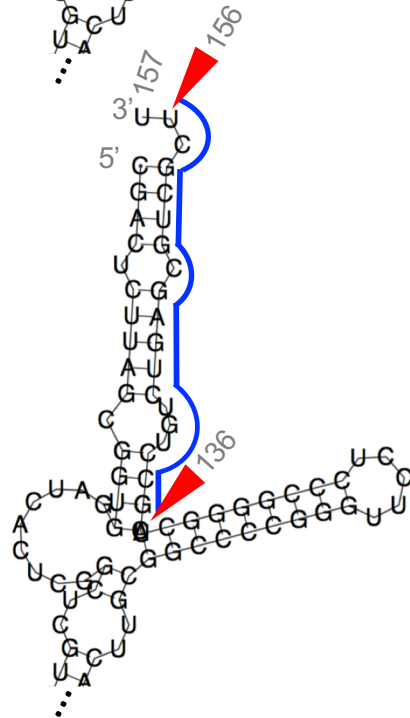

5.8S rRNA MFE: **-62.60** kcal/mol

**S6B**

5S 18-mer rRF

5S rRNA MFE: **-50.50** kcal/mol

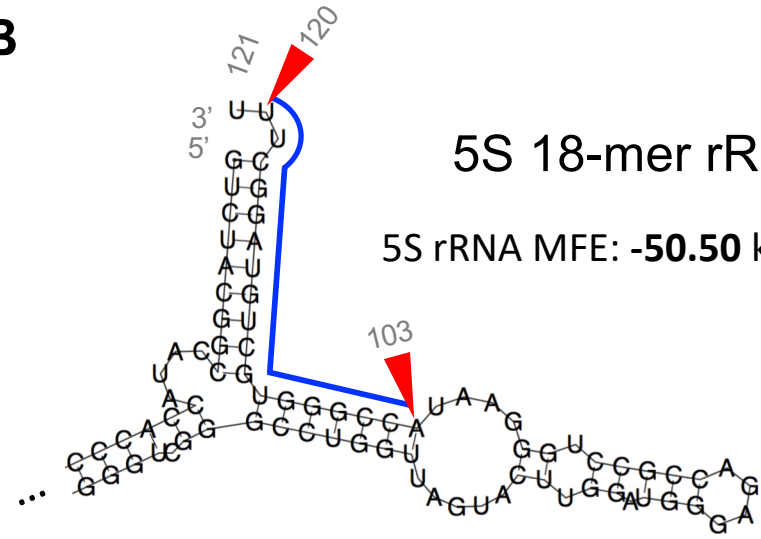

**S6C**

28S 20-mer rRF

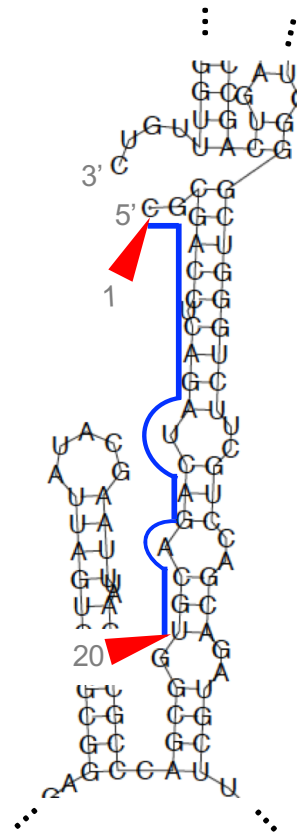

28S rRNA MFE: **-2810.90** kcal/mol
